# Supplementary figures and images for: Nucleotide Imbalance, Provoked by Downregulation of Aspartate Transcarbamoylase Impairs Cold Acclimation in Arabidopsis
Source: MDPI journal article supplement (doi:10.3390/molecules28041585), 2023-02-07

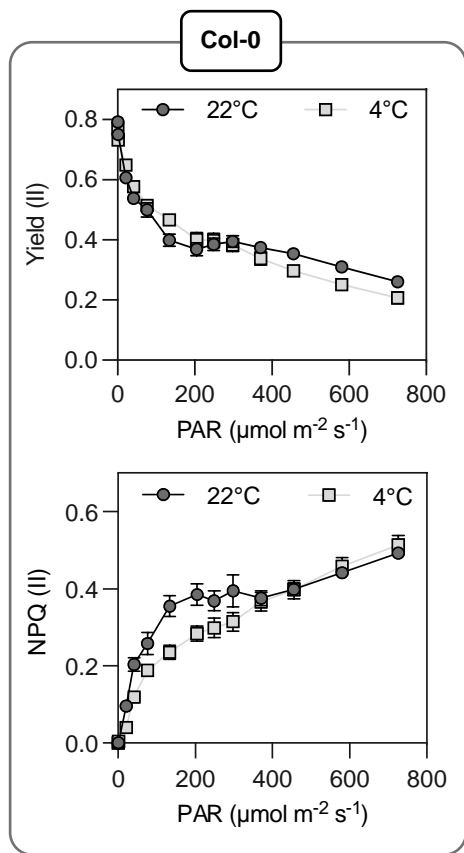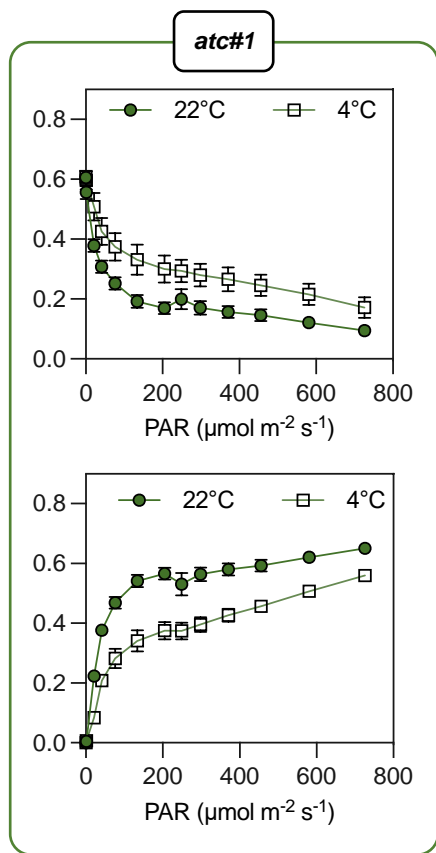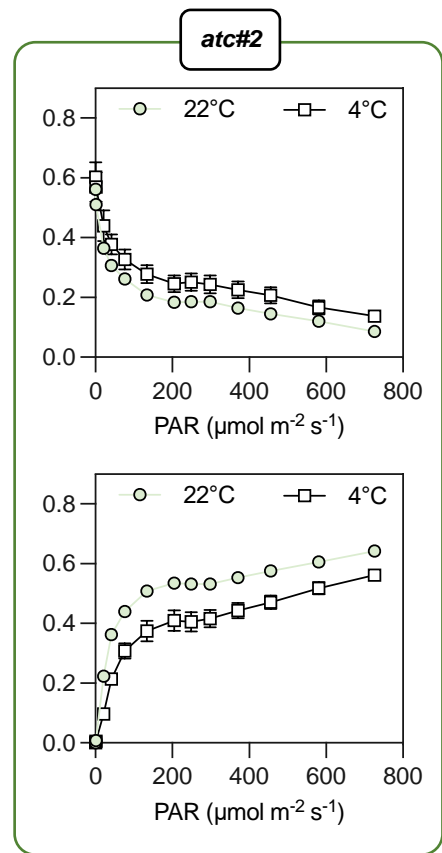

**Figure S1.** Photosynthetic parameters of Col-0 and *ATC* knockdown mutants grown in warm and cold

Supplement: s1 [file s1]
